# Supplementary material
Source: PubMed Central journal article supplement (PMC3153544)
Supplement: supp_101146_tele-mclean-1-at.pdf [file supp_101146_tele-mclean-1-at.pdf]

## **Appendix 1 (as supplied by the authors): Search strategy**

The Cochrane Airways Group Specialised Register of Trials was searched. All entries coded as "asthma" were searched with the following terms:

telehealth\* or tele-health\* or telemedicine\* or tele-medicine\* or internet\* or computer\* or web\* or interactive\* or telecommunication\* or telephone or phone or SMS or tele-monitor\* or telemonitor\* or telemanagement or tele-management or teleconsultation or tele-consultation or telecare\* or tele-care\* or telematic\* or telepharmacy or tele-pharmacy or telenurs\* or tele-nurs\* or video or email or e-mail or "remote consult\*" or wireless or bluetooth or tele-homecare or telehomecare or "remote care" or tele-support or telesupport or "mobile healthcare" or "computer mediated therapy" or ehealth or e-health or mhealth or m-health

### **Searching other resources**

In an attempt to uncover additional relevant published data, grey literature, unpublished data, and research in progress:

- Authors of the identified articles were contacted and asked to identify other published and unpublished randomised controlled trials.
- The references of all included articles were searched for further randomised controlled trials.
- The UK's National Institute of Health's Research Register: <https://portal.nihr.ac.uk/Pages/NRRArchive.aspx> was searched.
- Websites listing ongoing trials were searched: <http://clinicaltrials.gov/>; <http://www.controlled-trials.com/> and <http://www.actr.org.au/>.
